# Supplementary material
Source: MDPI journal article supplement (https://www.mdpi.com/2227-9717/11/11/3232)
Supplement: s1 [file s1]

## SUPPORTING INFORMATION

### Supplementary information S1

#### S1.1: The detailed simulation of ammonia production from syngas HYSYS Documentation

The decision variables in this case are:

Reformer temperature: 900°C

Combuster temperature: 1400°C

Low temperature conversion reactor temperature (LTC): 160°C

Fluid package: Peng-Robinson

Component: Methane, Ethane, Propane, i-Butane, n-Butane, Nitrogen, CO, CO<sub>2</sub>, H<sub>2</sub>O,

Oxygen, Hydrogen, Ammonia, Methanol

#### Reactions:

Set-1

| Rxn-1 Type: Equilibrium | Stoich Coeff |
|-------------------------|--------------|
|-------------------------|--------------|

|         |    |
|---------|----|
| Methane | -1 |
|---------|----|

|                  |    |
|------------------|----|
| H <sub>2</sub> O | -1 |
|------------------|----|

|    |   |
|----|---|
| CO | 1 |
|----|---|

|          |   |
|----------|---|
| Hydrogen | 3 |
|----------|---|

| Rxn-2 Type: Equilibrium | Stoich Coeff |
|-------------------------|--------------|
|-------------------------|--------------|

|        |    |
|--------|----|
| Ethane | -1 |
|--------|----|

|                  |    |
|------------------|----|
| H <sub>2</sub> O | -2 |
|------------------|----|

|    |   |
|----|---|
| CO | 2 |
|----|---|

|          |   |
|----------|---|
| Hydrogen | 5 |
|----------|---|

| Rxn-3 Type: Equilibrium | Stoich Coeff |
|-------------------------|--------------|
|-------------------------|--------------|

|                         |              |
|-------------------------|--------------|
| Propane                 | -1           |
| H <sub>2</sub> O        | -3           |
| CO                      | 3            |
| Hydrogen                | 7            |
| Rxn-4 Type: Equilibrium | Stoich Coeff |
| i-Butane                | -1           |
| H <sub>2</sub> O        | -4           |
| CO                      | 4            |
| Hydrogen                | 9            |
| Rxn-5 Type: Equilibrium | Stoich Coeff |
| n-Butane                | -1           |
| H <sub>2</sub> O        | -4           |
| CO                      | 4            |
| Hydrogen                | 9            |

#### Set-2

|                         |              |
|-------------------------|--------------|
| Rxn-1 Type: Equilibrium | Stoich Coeff |
| CO                      | -2           |
| Oxygen                  | -1           |
| CO <sub>2</sub>         | 2            |
| Rxn-2 Type: Equilibrium | Stoich Coeff |
| Hydrogen                | -2           |
| Oxygen                  | -1           |
| H <sub>2</sub> O        | 2            |
| Rxn-3 Type: Equilibrium | Stoich Coeff |
| Methane                 | -1           |

|                         |              |
|-------------------------|--------------|
| Oxygen                  | -2           |
| H <sub>2</sub> O        | 2            |
| CO <sub>2</sub>         | 1            |
| Rxn-4 Type: Equilibrium | Stoich Coeff |
| Ethane                  | -2           |
| Oxygen                  | -7           |
| H <sub>2</sub> O        | 6            |
| CO <sub>2</sub>         | 4            |
| Rxn-5 Type: Equilibrium | Stoich Coeff |
| Propane                 | -1           |
| Oxygen                  | -5           |
| H <sub>2</sub> O        | 4            |
| CO <sub>2</sub>         | 3            |

#### Set-3

|                         |              |
|-------------------------|--------------|
| Rxn-1 Type: Equilibrium | Stoich Coeff |
| CO                      | -1           |
| Hydrogen                | -3           |
| Methane                 | 1            |
| H <sub>2</sub> O        | 1            |
| Rxn-2 Type: Equilibrium | Stoich Coeff |
| CO <sub>2</sub>         | -1           |
| Hydrogen                | -4           |
| Methane                 | 1            |
| H <sub>2</sub> O        | 2            |

#### Set-4

|                     |              |
|---------------------|--------------|
| Rxn-1 Type: Kinetic | Stoich Coeff |
| Ammonia             | 2            |
| Hydrogen            | -3           |
| Nitrogen            | -1           |

#### Set-5

|                         |              |
|-------------------------|--------------|
| Rxn-1 Type: Equilibrium | Stoich Coeff |
| CO                      | -1           |
| H <sub>2</sub> O        | -1           |
| CO <sub>2</sub>         | 1            |
| Hydrogen                | 1            |

#### Streams:

##### HPSteam

|                  |               |
|------------------|---------------|
| Composition      | Mole fraction |
| H <sub>2</sub> O | 1.0000        |

Temperature = 350 °C

Pressure = 120 bar

##### NaturalGas

|             |               |
|-------------|---------------|
| Composition | Mole fraction |
| Methane     | 0.9575        |
| Ethane      | 0.0267        |
| Propane     | 0.0065        |
| i-Butane    | 0.0010        |
| n-Butane    | 0.0011        |
| Nitrogen    | 0.0072        |

Temperature = 25 °C

Pressure = 35 bar

Air

| Composition | Mole fraction |
|-------------|---------------|
|-------------|---------------|

|          |        |
|----------|--------|
| Nitrogen | 0.7900 |
|----------|--------|

|        |        |
|--------|--------|
| Oxygen | 0.2100 |
|--------|--------|

Temperature = 800 °C

Pressure = 35 bar

Reformer\_Feed (decision variable)

Temperature = 900 °C

Combuster\_Feed (decision variable)

Temperature = 1400 °C

W\_in\_1

| Composition | Mole fraction |
|-------------|---------------|
|-------------|---------------|

|                  |        |
|------------------|--------|
| H <sub>2</sub> O | 1.0000 |
|------------------|--------|

Temperature = 25 °C

Pressure = 1 bar

W\_out\_1

| Composition | Mole fraction |
|-------------|---------------|
|-------------|---------------|

|                  |        |
|------------------|--------|
| H <sub>2</sub> O | 1.0000 |
|------------------|--------|

Temperature = 80 °C

Pressure = 1 bar

WSGR1\_Feed

Temperature = 450 °C

W\_in\_2

| Composition | Mole fraction |
|-------------|---------------|
|-------------|---------------|

|                  |        |
|------------------|--------|
| H <sub>2</sub> O | 1.0000 |
|------------------|--------|

Temperature = 25 °C

Pressure = 1 bar

W\_out\_2

| Composition | Mole fraction |
|-------------|---------------|
|-------------|---------------|

|                  |        |
|------------------|--------|
| H <sub>2</sub> O | 1.0000 |
|------------------|--------|

Temperature = 80 °C

Pressure = 1 bar

WSGR2\_Feed (decision variable)

Temperature = 160 °C

W\_in\_3

| Composition | Mole fraction |
|-------------|---------------|
|-------------|---------------|

|                  |        |
|------------------|--------|
| H <sub>2</sub> O | 1.0000 |
|------------------|--------|

Temperature = 25 °C

Pressure = 1 bar

W\_out\_3

| Composition | Mole fraction |
|-------------|---------------|
|-------------|---------------|

|                  |        |
|------------------|--------|
| H <sub>2</sub> O | 1.0000 |
|------------------|--------|

Temperature = 80 °C

Pressure = 1 bar

Separator1\_Feed

Temperature = 100 °C

Methanizer\_Feed

Temperature = 340 °C

W\_in\_5

| Composition | Mole fraction |
|-------------|---------------|
|-------------|---------------|

|                  |        |
|------------------|--------|
| H <sub>2</sub> O | 1.0000 |
|------------------|--------|

Temperature = 25 °C

Pressure = 1 bar

W\_out\_5

| Composition | Mole fraction |
|-------------|---------------|
|-------------|---------------|

|                  |        |
|------------------|--------|
| H <sub>2</sub> O | 1.0000 |
|------------------|--------|

Temperature = 80 °C

Pressure = 1 bar

Separator2\_Feed

Temperature = 40 °C

Make-up N2

| Composition | Mole fraction |
|-------------|---------------|
|-------------|---------------|

|          |        |
|----------|--------|
| Nitrogen | 1.0000 |
|----------|--------|

Temperature = 0 °C

Pressure = 140 bar

Molar Flow = 1000 kgmole/hr

ComP1\_out

Pressure = 80 bar

W\_in\_6

| Composition | Mole fraction |
|-------------|---------------|
|-------------|---------------|

|                  |        |
|------------------|--------|
| H <sub>2</sub> O | 1.0000 |
|------------------|--------|

Temperature = 25 °C

Pressure = 1 bar

W\_out\_6

| Composition | Mole fraction |
|-------------|---------------|
|-------------|---------------|

|                  |        |
|------------------|--------|
| H <sub>2</sub> O | 1.0000 |
|------------------|--------|

Temperature = 80 °C

Pressure = 1 bar

Cool2\_out

Temperature = 90 °C

Comp2\_out

Pressure = 150 bar

W\_in\_7

| Composition | Mole fraction |
|-------------|---------------|
|-------------|---------------|

|                  |        |
|------------------|--------|
| H <sub>2</sub> O | 1.0000 |
|------------------|--------|

Temperature = 25 °C

Pressure = 1 bar

W\_out\_7

| Composition | Mole fraction |
|-------------|---------------|
|-------------|---------------|

|                  |        |
|------------------|--------|
| H <sub>2</sub> O | 1.0000 |
|------------------|--------|

Temperature = 80 °C

Pressure = 1 bar

Separator3\_Feed

Temperature = 40 °C

Feed\_1

Temperature = 450 °C

W\_in\_9



Composition                      Mole fraction

H<sub>2</sub>O                                1.0000

Temperature = 25 °C

Pressure = 1 bar

W\_out\_9

Composition                      Mole fraction

H<sub>2</sub>O                                1.0000

Temperature = 80 °C

Pressure = 1 bar

Product\_separator

Vapor-Phase Fraction = 1.0000

Recycle

Temperature = 20 °C

LN2\_in

Composition                      Mole fraction

Nitrogen                          1.0000

Temperature = -196.2 °C

Pressure = 1 bar

LN2\_out

Composition                      Mole fraction

Nitrogen                          1.0000

Temperature = -80 °C

Pressure = 1 bar

Liquid\_to\_separator

Temperature = -45 °C

Vessel:

Reformer

Reaction Set: Set-1

Combuster

Reaction Set: Set-2

HTC

Reaction Set: Set-5

LTC

Reaction Set: Set-5

Methanizer

Reaction Set: Set-3

For all plug flow reactors

Reaction Set: Set-4

Heater:

E-100

Inlet Stream: Feed

Outlet: Reformer\_Feed

Delta P: 0 bar

E-113

Inlet Stream: Heated\_re\_pro

Outlet: Combuster\_Feed

Delta P: 0 bar

E-104

Inlet Stream: SynGas\_Flow

Outlet: Methanizer\_Feed

Delta P: 0 bar

Heat Exchanger:

For all heat exchangers:

Heat Exchanger Model: Simple Weighted

Tube Side Delta P = 0 bar

Shell Side Delta P = 0 bar

Mixer:

MIX-100

Feed

| Composition      | Mole fraction |
|------------------|---------------|
| Methane          | 0.2522        |
| Ethane           | 0.0070        |
| Propane          | 0.0017        |
| i-Butane         | 0.0003        |
| n-Butane         | 0.0003        |
| Nitrogen         | 0.0019        |
| H <sub>2</sub> O | 0.7366        |

MIX-101

Heated\_re\_pro

| Composition      | Mole fraction |
|------------------|---------------|
| Methane          | 0.0326        |
| Nitrogen         | 0.1192        |
| CO               | 0.1294        |
| H <sub>2</sub> O | 0.3066        |

|        |        |
|--------|--------|
| Oxygen | 0.0314 |
|--------|--------|

|          |        |
|----------|--------|
| Hydrogen | 0.3809 |
|----------|--------|

MIX-102

Feed\_ammonia

|             |               |
|-------------|---------------|
| Composition | Mole fraction |
|-------------|---------------|

|         |        |
|---------|--------|
| Methane | 0.0147 |
|---------|--------|

|          |        |
|----------|--------|
| Nitrogen | 0.6462 |
|----------|--------|

|                  |        |
|------------------|--------|
| H <sub>2</sub> O | 0.0005 |
|------------------|--------|

|          |        |
|----------|--------|
| Hydrogen | 0.3319 |
|----------|--------|

|         |        |
|---------|--------|
| Ammonia | 0.0066 |
|---------|--------|

MIX-103

32

|             |               |
|-------------|---------------|
| Composition | Mole fraction |
|-------------|---------------|

|         |        |
|---------|--------|
| Methane | 0.0012 |
|---------|--------|

|          |        |
|----------|--------|
| Nitrogen | 0.2585 |
|----------|--------|

|                  |        |
|------------------|--------|
| H <sub>2</sub> O | 0.0027 |
|------------------|--------|

|          |        |
|----------|--------|
| Hydrogen | 0.7376 |
|----------|--------|

MIX-104

Feed\_2

|             |               |
|-------------|---------------|
| Composition | Mole fraction |
|-------------|---------------|

|         |        |
|---------|--------|
| Methane | 0.0189 |
|---------|--------|

|          |        |
|----------|--------|
| Nitrogen | 0.6882 |
|----------|--------|

|                  |        |
|------------------|--------|
| H <sub>2</sub> O | 0.0006 |
|------------------|--------|

|         |        |
|---------|--------|
| Ammonia | 0.2922 |
|---------|--------|

MIX-105

Feed\_3

| Composition      | Mole fraction |
|------------------|---------------|
| Methane          | 0.0190        |
| Nitrogen         | 0.6887        |
| H <sub>2</sub> O | 0.0006        |
| Ammonia          | 0.2917        |

TEE:

TEE-100

Split Fraction

Quench1 = 0.9950

Quench2 = 0.0025

Quench3 = 0.0025

TEE-101

Split Fraction

Purge = 0.0100

Product to liquid = 0.9900

Recycle:

RCY-3

Inlet Stream: N2\_to\_Recycle

Outlet Stream: N2\_recycle

## **S1.2: The detailed simulation of methanol production with a recycle** HYSYS Documentation

The decision variables in this case are:

Pressure of the equilibrium reactor (ERV-100): 70 bar

Temperature of the equilibrium reactor (ERV-100): 190 °C

Temperature of a separator (E-101): 60 °C

Recycle ratio (RCY-1): 1

Fluid package: Peng Robinson

Component: CO<sub>2</sub>, Hydrogen, Methanol, CO, H<sub>2</sub>O

### Reactions:

#### Set-1

| Rxn-1 Type: Equilibrium | Stoich Coeff |
|-------------------------|--------------|
|-------------------------|--------------|

|                 |    |
|-----------------|----|
| CO <sub>2</sub> | -1 |
|-----------------|----|

|                  |   |
|------------------|---|
| H <sub>2</sub> O | 1 |
|------------------|---|

|          |   |
|----------|---|
| Methanol | 1 |
|----------|---|

|          |    |
|----------|----|
| Hydrogen | -3 |
|----------|----|

| Rxn-2 Type: Equilibrium | Stoich Coeff |
|-------------------------|--------------|
|-------------------------|--------------|

|    |    |
|----|----|
| CO | -1 |
|----|----|

|          |   |
|----------|---|
| Methanol | 1 |
|----------|---|

|          |    |
|----------|----|
| Hydrogen | -2 |
|----------|----|

| Rxn-3 Type: Equilibrium | Stoich Coeff |
|-------------------------|--------------|
|-------------------------|--------------|

|                 |    |
|-----------------|----|
| CO <sub>2</sub> | -1 |
|-----------------|----|

|    |   |
|----|---|
| CO | 1 |
|----|---|

|          |   |
|----------|---|
| Methanol | 1 |
|----------|---|

|          |    |
|----------|----|
| Hydrogen | -1 |
|----------|----|

Streams:

Hydrogen

| Composition | Mole fraction |
|-------------|---------------|
|-------------|---------------|

|          |        |
|----------|--------|
| Hydrogen | 1.0000 |
|----------|--------|

Temperature = 25 °C

Pressure = 20 bar

Carbon dioxide

| Composition | Mole fraction |
|-------------|---------------|
|-------------|---------------|

|                 |        |
|-----------------|--------|
| CO <sub>2</sub> | 1.0000 |
|-----------------|--------|

Temperature = 40 °C

Pressure = 20 bar

Compressed feed (decision variable)

Pressure = 70 bar

Heated feed (decision variable)

Temperature = 190 °C

Water\_in

| Composition | Mole fraction |
|-------------|---------------|
|-------------|---------------|

|                  |        |
|------------------|--------|
| H <sub>2</sub> O | 1.0000 |
|------------------|--------|

Temperature = 20 °C

Pressure = 1 bar

Water\_out

| Composition | Mole fraction |
|-------------|---------------|
|-------------|---------------|

|                  |        |
|------------------|--------|
| H <sub>2</sub> O | 1.0000 |
|------------------|--------|

Temperature = 35 °C

Pressure = 1 bar

Cooled product (decision variable)

Temperature = 60 °C

Vessel:

ERV-100

Reaction Set: Set-1

Towers:

T-100

Number of stages: 10

Inlet Stream

Stream: Cooled product (decision variable)

Inlet Stage: 5\_Main Tower

Condenser: Full Reflux

Condenser Pressure = 4 bar

Condenser Delta P = 0 bar

Reboiler Pressure = 4 bar

Reboiler Delta P = 0 bar

Specifications:

Condenser Temperature = 25 °C

Reflux Ratio = 0.6

T-101

Number of stages: 10

Inlet Stream

Stream: Methanol-water

Inlet Stage: 5\_Main Tower

Condenser: Total



Condenser Pressure = 4 bar

Condenser Delta P = 0 bar

Reboiler Pressure = 4 bar

Reboiler Delta P = 0 bar

Specifications:

Comp Fraction

Stage: Condenser

Flow Basis: Mole Fraction

Phase: Liquid

Spec Value: 0.9950

Component: Methanol

Reflux Ratio = 30

Heater:

Inlet Stream: Mixed feed

Outlet: Heated feed

Delta P: 0 bar

Heat Exchanger:

For all heat exchangers:

Heat Exchanger Model: Simple Weighted

Tube Side Delta P = 0 bar

Shell Side Delta P = 0 bar

Mixer:

MIX-100

Feed

Composition

Mole fraction

|          |        |
|----------|--------|
| Hydrogen | 0.7500 |
|----------|--------|

|                 |        |
|-----------------|--------|
| CO <sub>2</sub> | 0.2500 |
|-----------------|--------|

MIX-101

Mixed feed

|             |               |
|-------------|---------------|
| Composition | Mole fraction |
|-------------|---------------|

|          |        |
|----------|--------|
| Hydrogen | 0.8053 |
|----------|--------|

|                 |        |
|-----------------|--------|
| CO <sub>2</sub> | 0.1886 |
|-----------------|--------|

|    |        |
|----|--------|
| CO | 0.0013 |
|----|--------|

|          |        |
|----------|--------|
| Methanol | 0.0039 |
|----------|--------|

|                  |        |
|------------------|--------|
| H <sub>2</sub> O | 0.0009 |
|------------------|--------|

MIX-102

Combined product

|             |               |
|-------------|---------------|
| Composition | Mole fraction |
|-------------|---------------|

|          |        |
|----------|--------|
| Hydrogen | 0.0025 |
|----------|--------|

|                 |        |
|-----------------|--------|
| CO <sub>2</sub> | 0.0154 |
|-----------------|--------|

|    |        |
|----|--------|
| CO | 0.0000 |
|----|--------|

|          |        |
|----------|--------|
| Methanol | 0.4911 |
|----------|--------|

|                  |        |
|------------------|--------|
| H <sub>2</sub> O | 0.4910 |
|------------------|--------|

TEE:

TEE-100

Split Fraction

To recycle = 1.00

To mixer = 0.00

Recycle:

RCY-1

Inlet Stream: To recycle

Outlet Stream: Recycle

Valves:

VLV-101

Inlet stream: To mixer

Outlet stream:

Pressure = 4 bar

VLV-102

Inlet stream: Liquid\_product

Outlet stream

Pressure = 4 bar

**S1.3: The detailed simulation of CO<sub>2</sub> absorption by methanol via Rectisol**

**process HYSYS Documentation**

The decision variables in this case are:

Lean methanol temperature: -25.0°C

The 3<sup>rd</sup> stage separator pressure: 1.2 bar

Stripper reflux ratio: 5

Stripper inlet temperature: 40°C

Distillation reflux ratio: 1

Fluid package: PRSV

Component: Methanol, CO<sub>2</sub>, Ammonia, CO, Argon, Nitrogen, Hydrogen, H<sub>2</sub>O, Methane

Streams:

Syngas Feed

Composition

Mole fraction

|                  |        |
|------------------|--------|
| CO <sub>2</sub>  | 0.4590 |
| Ammonia          | 0.0001 |
| CO               | 0.0052 |
| Argon            | 0.0085 |
| Nitrogen         | 0.4923 |
| Hydrogen         | 0.0272 |
| H <sub>2</sub> O | 0.0027 |
| Methane          | 0.0050 |

Temperature = 18.30 °C

Pressure = 17.24 bar

Lean Methanol

| Composition      | Mole fraction |
|------------------|---------------|
| Methanol         | 0.9998        |
| H <sub>2</sub> O | 0.0002        |

Temperature (decision variable) = -25 °C

Pressure = 17.20 bar

5F (decision variable)

Temperature = 40 °C

Methanol

| Composition | Mole fraction |
|-------------|---------------|
| Methanol    | 1.0000        |

Temperature = 21 °C

Pressure = 1.1 bar

NH-3

| Composition | Mole fraction |
|-------------|---------------|
|-------------|---------------|

Ammonia 1.0000

Temperature = -70 °C

Pressure = 1 bar

NH-4

Composition Mole fraction

Ammonia 1.0000

Temperature = -50 °C

Pressure = 1 bar

Towers:

Absorber

Number of stages: 15

Inlet Stream

Stream: 5B-3

Inlet Stage: 15\_Main Tower

Top Stage Inlet: Lean Methanol

Stripper

Number of stages: 10

Inlet Stream

Stream: 5F (decision variable)

Inlet Stage: 10\_Main Tower

Stream: 3C-3 (decision variable)

Inlet Stage: 11\_Main Tower

Condenser: Full Reflux

Condenser Pressure = 1.1 bar

Condenser Delta P = 0 bar

Reboiler Pressure = 1.1 bar

Reboiler Delta P = 0 bar

Specifications:

Comp Ratio = 0.9500

Reflux Ratio (decision variable) = 5

Distillation

Number of stages: 12

Inlet Stream

Stream: 2

Inlet Stage: 5\_Main Tower

Condenser: Full Reflux

Condenser Pressure = 3.4 bar

Condenser Delta P = 0 bar

Reboiler Pressure = 3.4 bar

Reboiler Delta P = 0 bar

Specifications:

Comp Ratio = 0.99

Reflux Ratio (decision variable) = 1

Heat Exchanger:

For all heat exchangers:

Heat Exchanger Model: Simple Weighted

Tube Side Delta P = 0 bar

Shell Side Delta P = 0 bar

Mixer:

MIX-100

6A-7

| Composition      | Mole fraction |
|------------------|---------------|
| Methanol         | 0.9999        |
| H <sub>2</sub> O | 0.0001        |

MIX-101

1B

| Composition      | Mole fraction |
|------------------|---------------|
| Methanol         | 0.1862        |
| CO <sub>2</sub>  | 0.2004        |
| Ammonia          | 0.0002        |
| CO               | 0.0036        |
| Argon            | 0.0041        |
| Nitrogen         | 0.3376        |
| Hydrogen         | 0.2593        |
| H <sub>2</sub> O | 0.0029        |
| Methane          | 0.0059        |

MIX-102

4H

| Composition     | Mole fraction |
|-----------------|---------------|
| Methanol        | 0.0146        |
| CO <sub>2</sub> | 0.9476        |
| Ammonia         | 0.0008        |
| CO              | 0.0001        |
| Argon           | 0.0006        |
| Nitrogen        | 0.0344        |

Hydrogen 0.0001

Methane 0.0019

TEE:

TEE-100

Split Fraction

$$6C = 0.9400$$

$$6D-1 = 0.0600$$

Valve:

VLV-100

Inlet stream: 3A

Outlet stream: 2

$$\text{Pressure} = 3.4 \text{ bar}$$

VLV-101

Inlet stream: 5C

Outlet stream: 5C-2

$$\text{Pressure} = 4.5 \text{ bar}$$

VLV-102

Inlet stream: 5A

Outlet stream: 5A-2

$$\text{Pressure} = 10.5 \text{ bar}$$

VLV-103

Inlet stream: 5D

Outlet stream: 5D-2

$$\text{Pressure} = 4.5 \text{ bar (decision variable)}$$

Recycle:



RCY-1

Inlet Stream: 5B

Outlet Stream: 5B-2

RCY-2

Inlet Stream: 6D-1

Outlet Stream: 6D

RCY-3

Inlet Stream: 6E-1

Outlet Stream: Lean Methanol

RCY-4

Inlet Stream: 3C-2

Outlet Stream: 3C

## Supplementary information S2

### S2.1: Final data set of Case study I: ammonia production from syngas

| Sample no. | Decision variables |         |        | Response                |
|------------|--------------------|---------|--------|-------------------------|
|            | $x_1$              | $x_2$   | $x_3$  | Ammonia production cost |
| 1          | 1153.47            | 1522.43 | 190.06 | 576.03                  |
| 2          | 989.12             | 1467.24 | 281.62 | 556.63                  |
| 3          | 1164.99            | 1672.82 | 254.31 | 648.00                  |
| 4          | 1124.42            | 1567.96 | 202.96 | 588.94                  |
| 5          | 922.86             | 1406.41 | 205.68 | 505.25                  |
| 6          | 1048.96            | 1547.33 | 264.13 | 585.45                  |
| 7          | 1037.08            | 1505.91 | 167.29 | 549.42                  |
| 8          | 1016.11            | 1603.51 | 162.43 | 583.59                  |
| 9          | 976.84             | 1690.36 | 196.72 | 621.42                  |
| 10         | 1095.54            | 1455.63 | 223.08 | 548.77                  |
| 11         | 933.05             | 1417.36 | 173.66 | 506.26                  |
| 12         | 906.22             | 1653.35 | 228.98 | 607.52                  |
| 13         | 1189.02            | 1576.66 | 287.31 | 632.67                  |
| 14         | 1180.29            | 1593.89 | 219.19 | 611.34                  |
| 15         | 971.01             | 1620.26 | 245.53 | 599.96                  |
| 16         | 1135.40            | 1495.11 | 270.62 | 583.39                  |
| 17         | 1007.10            | 1665.00 | 271.47 | 633.36                  |
| 18         | 1061.01            | 1536.71 | 248.98 | 577.83                  |
| 19         | 1100.68            | 1481.80 | 184.73 | 552.14                  |
| 20         | 955.61             | 1628.75 | 211.49 | 595.98                  |
| 21         | 1074.02            | 1433.58 | 234.38 | 538.25                  |
| 22         | 1121.60            | 1567.94 | 201.16 | 588.01                  |
| 23         | 1114.70            | 1564.07 | 198.40 | 585.01                  |
| 24         | 900.00             | 1432.03 | 160.00 | 507.48                  |
| 25         | 1007.20            | 1666.77 | 275.99 | 636.49                  |
| 26         | 1006.64            | 1659.79 | 272.91 | 631.79                  |
| 27         | 900.00             | 1400.00 | 183.04 | 497.62                  |
| 28         | 996.40             | 1468.40 | 283.43 | 559.07                  |
| 29         | 990.83             | 1459.03 | 278.79 | 552.75                  |
| 30         | 900.00             | 1400.00 | 177.05 | 497.13                  |

## S2.2: Final data set of Case study II: methanol production via carbon dioxide

### hydrogenation

| Sample no. | Decision variables |                |                |                | Response                 |
|------------|--------------------|----------------|----------------|----------------|--------------------------|
|            | X <sub>1</sub>     | X <sub>2</sub> | X <sub>3</sub> | X <sub>4</sub> | Methanol production cost |
| 1          | 68.43              | 201.98         | 62.00          | 0.6046         | 1618.57                  |
| 2          | 57.86              | 201.15         | 65.57          | 0.1721         | 2898.02                  |
| 3          | 55.86              | 193.07         | 70.48          | 0.1395         | 2760.07                  |
| 4          | 53.27              | 191.74         | 79.37          | 0.4834         | 2001.59                  |
| 5          | 58.77              | 194.46         | 74.66          | 0.9282         | 1090.09                  |
| 6          | 57.50              | 207.15         | 67.57          | 0.5387         | 2084.13                  |
| 7          | 52.28              | 208.60         | 67.01          | 0.0128         | 4381.01                  |
| 8          | 59.75              | 202.47         | 77.17          | 0.0714         | 3133.65                  |
| 9          | 52.09              | 202.88         | 78.28          | 0.8561         | 1330.76                  |
| 10         | 63.86              | 194.20         | 72.25          | 0.4568         | 1836.09                  |
| 11         | 50.06              | 200.68         | 64.56          | 0.3766         | 2663.30                  |
| 12         | 63.43              | 206.21         | 61.16          | 0.8169         | 1329.13                  |
| 13         | 66.12              | 196.73         | 76.52          | 0.3568         | 2020.91                  |
| 14         | 54.46              | 209.62         | 71.58          | 0.5097         | 2337.28                  |
| 15         | 60.69              | 190.78         | 78.95          | 0.7016         | 1416.77                  |
| 16         | 62.18              | 196.04         | 60.13          | 0.8650         | 1182.66                  |
| 17         | 50.88              | 198.26         | 70.79          | 0.3058         | 2758.26                  |
| 18         | 61.03              | 190.33         | 66.12          | 0.6630         | 1475.46                  |
| 19         | 64.87              | 203.78         | 76.19          | 0.9625         | 1042.72                  |
| 20         | 53.93              | 199.99         | 63.15          | 0.1054         | 3290.48                  |
| 21         | 66.77              | 198.71         | 69.36          | 0.6396         | 1534.88                  |
| 22         | 69.29              | 207.04         | 68.78          | 0.4074         | 2073.98                  |
| 23         | 67.25              | 208.23         | 75.44          | 0.2771         | 2465.39                  |
| 24         | 61.46              | 205.53         | 73.76          | 0.2200         | 2757.53                  |
| 25         | 56.66              | 195.45         | 63.60          | 0.7194         | 1493.37                  |
| 26         | 65.43              | 197.38         | 68.18          | 0.9656         | 1023.04                  |
| 27         | 55.05              | 204.88         | 62.47          | 0.1968         | 3153.04                  |
| 28         | 68.94              | 192.66         | 73.35          | 0.7778         | 1239.14                  |
| 29         | 52.70              | 209.22         | 66.89          | 0.0189         | 4355.37                  |
| 30         | 52.44              | 208.65         | 66.68          | 0.0089         | 4386.29                  |
| 31         | 70.00              | 190.00         | 80.00          | 1.0000         | 942.45                   |
| 32         | 56.17              | 193.42         | 70.66          | 0.1289         | 2784.44                  |
| 33         | 55.83              | 193.07         | 70.06          | 0.1238         | 2801.24                  |
| 34         | 68.41              | 204.98         | 60.00          | 1.0000         | 1002.55                  |
| 35         | 55.54              | 204.82         | 62.81          | 0.2136         | 3063.39                  |
| 36         | 55.20              | 204.34         | 62.14          | 0.1939         | 3127.63                  |
| 37         | 70.00              | 190.00         | 70.96          | 1.0000         | 950.13                   |
| 38         | 52.02              | 203.43         | 78.36          | 0.8399         | 1375.90                  |
| 39         | 51.43              | 203.04         | 78.12          | 0.8220         | 1423.52                  |

|    |       |        |       |        |         |
|----|-------|--------|-------|--------|---------|
| 40 | 70.00 | 207.99 | 76.01 | 1.0000 | 989.75  |
| 41 | 52.46 | 208.82 | 66.99 | 0.0167 | 4359.64 |
| 42 | 52.27 | 208.64 | 66.90 | 0.0026 | 4435.38 |
| 43 | 65.91 | 191.32 | 80.00 | 1.0000 | 952.13  |
| 44 | 68.48 | 201.93 | 61.83 | 0.6047 | 1617.03 |
| 45 | 68.11 | 201.56 | 61.67 | 0.5767 | 1667.13 |
| 46 | 67.24 | 194.77 | 60.00 | 1.0000 | 972.79  |

**S2.3: Final data set of Case study III: CO<sub>2</sub> absorption by methanol via Rectisol process**

| Sample no. | Decision variables |                |                |                |                | Response     |
|------------|--------------------|----------------|----------------|----------------|----------------|--------------|
|            | X <sub>1</sub>     | X <sub>2</sub> | X <sub>3</sub> | X <sub>4</sub> | X <sub>5</sub> | Capture cost |
| 1          | -49.23             | 1.229          | 8.771          | 16.72          | 6.136          | 112.46       |
| 2          | -23.43             | 1.606          | 6.422          | 22.06          | 9.323          | 117.24       |
| 3          | -46.37             | 1.479          | 16.311         | 26.65          | 9.631          | 176.00       |
| 4          | -52.99             | 1.939          | 5.777          | 26.26          | 4.232          | 98.36        |
| 5          | -43.91             | 1.304          | 9.989          | 27.30          | 5.244          | 105.41       |
| 6          | -35.83             | 1.734          | 11.425         | 33.87          | 6.573          | 122.39       |
| 7          | -29.26             | 1.774          | 16.645         | 29.45          | 5.769          | 136.68       |
| 8          | -20.29             | 1.630          | 5.076          | 29.81          | 3.585          | 72.66        |
| 9          | -25.61             | 1.724          | 15.599         | 31.89          | 9.765          | 154.00       |
| 10         | -33.49             | 1.407          | 14.172         | 14.41          | 2.664          | 102.97       |
| 11         | -26.56             | 1.499          | 14.933         | 37.13          | 1.862          | 90.03        |
| 12         | -47.20             | 1.701          | 12.639         | 11.87          | 8.579          | 163.88       |
| 13         | -36.66             | 1.753          | 15.806         | 38.20          | 7.604          | 151.40       |
| 14         | -51.74             | 1.209          | 8.156          | 21.18          | 2.375          | 85.44        |
| 15         | -21.51             | 1.571          | 19.422         | 28.41          | 2.183          | 115.72       |
| 16         | -45.17             | 1.360          | 11.636         | 23.43          | 4.487          | 112.75       |
| 17         | -54.88             | 1.318          | 6.779          | 32.88          | 8.186          | 117.28       |
| 18         | -27.94             | 1.908          | 17.157         | 25.36          | 5.035          | 139.27       |
| 19         | -28.85             | 1.545          | 10.494         | 34.67          | 6.920          | 109.08       |
| 20         | -40.91             | 1.453          | 13.837         | 13.33          | 1.080          | 102.48       |
| 21         | -41.45             | 1.405          | 19.922         | 31.09          | 6.322          | 156.90       |
| 22         | -22.28             | 1.876          | 8.943          | 19.14          | 2.952          | 90.87        |
| 23         | -37.87             | 1.639          | 9.499          | 15.73          | 8.247          | 129.13       |
| 24         | -39.25             | 1.285          | 10.769         | 35.07          | 7.702          | 116.51       |
| 25         | -32.00             | 1.967          | 18.855         | 24.06          | 3.465          | 145.87       |
| 26         | -50.41             | 1.909          | 14.659         | 17.47          | 5.441          | 169.91       |
| 27         | -31.20             | 1.999          | 7.858          | 14.24          | 4.605          | 100.30       |
| 28         | -48.86             | 1.858          | 17.927         | 39.68          | 6.867          | 189.42       |
| 29         | -30.46             | 1.260          | 6.016          | 20.01          | 3.300          | 70.23        |
| 30         | -42.96             | 1.542          | 13.111         | 18.21          | 3.837          | 121.05       |
| 31         | -53.77             | 1.450          | 13.157         | 10.62          | 8.903          | 170.07       |
| 32         | -38.17             | 1.811          | 7.449          | 20.61          | 7.288          | 114.72       |
| 33         | -44.51             | 1.678          | 12.252         | 36.21          | 9.039          | 151.20       |
| 34         | -34.99             | 1.339          | 18.361         | 11.32          | 1.331          | 110.01       |
| 35         | -24.48             | 1.821          | 17.773         | 38.30          | 1.602          | 110.28       |
| 36         | -48.02             | 1.858          | 18.145         | 39.71          | 6.791          | 188.79       |
| 37         | -48.63             | 1.844          | 17.895         | 39.53          | 6.679          | 187.08       |
| 38         | -31.21             | 1.200          | 5.000          | 33.95          | 1.000          | 46.35        |
| 39         | -28.21             | 1.560          | 10.533         | 34.84          | 7.057          | 110.19       |
| 40         | -28.71             | 1.549          | 10.237         | 34.10          | 7.031          | 109.09       |

|    |        |       |        |       |       |        |
|----|--------|-------|--------|-------|-------|--------|
| 41 | -20.00 | 1.200 | 5.000  | 23.67 | 1.000 | 52.59  |
| 42 | -54.08 | 1.337 | 6.945  | 33.02 | 8.083 | 117.89 |
| 43 | -54.86 | 1.322 | 6.803  | 32.38 | 8.018 | 116.86 |
| 44 | -35.74 | 1.200 | 5.000  | 33.89 | 1.000 | 47.83  |
| 45 | -34.31 | 1.351 | 18.645 | 11.61 | 1.513 | 112.37 |
| 46 | -34.72 | 1.346 | 18.324 | 10.94 | 1.279 | 110.24 |
| 47 | -20.00 | 1.281 | 5.000  | 39.31 | 1.000 | 46.12  |
| 48 | -40.07 | 1.474 | 13.826 | 13.09 | 1.129 | 102.81 |
| 49 | -40.84 | 1.455 | 13.619 | 12.96 | 1.042 | 99.59  |
| 50 | -26.47 | 1.280 | 5.000  | 40.00 | 1.000 | 43.95  |
| 51 | -24.38 | 1.829 | 17.729 | 38.81 | 1.694 | 111.06 |
| 52 | -24.87 | 1.827 | 17.530 | 38.38 | 1.617 | 109.80 |
| 53 | -37.16 | 1.511 | 5.000  | 40.00 | 1.000 | 50.04  |

## Supplementary information S3

### S3.1 Weights and biases of an artificial neural networks for training the data set of random sampling.

#### S3.1.1 Case study I: ammonia production from syngas

Mean square errors:

| Data set   | MSE      |
|------------|----------|
| Training   | 1.52E-05 |
| Validation | 1.19E-04 |
| Testing    | 4.52E-05 |

Weight 1,  $WI_{r,k}$

| Neurons | Input nodes |         |         |
|---------|-------------|---------|---------|
|         | 1           | 2       | 3       |
| 1       | -2.3682     | 0.6228  | 0.5254  |
| 2       | -0.1803     | -0.0498 | -1.3409 |
| 3       | 0.1440      | 0.2659  | -0.0401 |
| 4       | -1.4446     | 1.7557  | 0.5200  |
| 5       | -0.1177     | 0.1200  | 0.4391  |
| 6       | -1.3274     | 0.0407  | -1.3057 |
| 7       | -0.2760     | -1.7613 | 0.0743  |
| 8       | 2.0677      | -1.8151 | -0.6159 |

Weight 2,  $W2_r$

| Neurons | Output node |
|---------|-------------|
| 1       | -0.0416     |
| 2       | -0.3629     |
| 3       | 2.3181      |
| 4       | 0.0745      |
| 5       | 0.8902      |
| 6       | -0.0186     |
| 7       | -0.0540     |
| 8       | -0.1241     |

Bias 1,  $BI_r$

| Neurons | Output node |
|---------|-------------|
| 1       | 2.3922      |
| 2       | 1.3427      |
| 3       | -0.2083     |
| 4       | -0.3426     |
| 5       | 1.4267      |
| 6       | -0.1934     |
| 7       | -1.8252     |
| 8       | 2.5504      |

|            |        |
|------------|--------|
| Bias 2, B2 | 0.0129 |
|------------|--------|

### S3.1.2 Case study II: methanol production via carbon dioxide hydrogenation

Mean square errors:

| Data set   | MSE      |
|------------|----------|
| Training   | 3.20E-07 |
| Validation | 8.24E-06 |
| Testing    | 4.61E-06 |

Weight 1,  $WI_{r,k}$

| Neurons | Input nodes |         |         |         |
|---------|-------------|---------|---------|---------|
|         | 1           | 2       | 3       | 4       |
| 1       | 0.9948      | 0.6365  | -0.1825 | -0.1942 |
| 2       | 0.3067      | 0.2540  | -0.2935 | -2.6807 |
| 3       | -0.9732     | 1.3545  | 1.0360  | -1.0357 |
| 4       | 0.7542      | -0.6835 | 0.0090  | -0.7380 |
| 5       | 0.0794      | -0.0215 | -0.0181 | 0.7138  |
| 6       | 1.0944      | -0.9190 | 0.0708  | -0.6277 |
| 7       | -0.2468     | 0.2019  | -0.0045 | -0.4551 |
| 8       | -1.1972     | 0.5411  | -0.0324 | -1.2129 |



Weight 2,  $W2_r$

| Neurons | Output node |
|---------|-------------|
| 1       | 0.0225      |
| 2       | 0.0272      |
| 3       | -0.0055     |
| 4       | 0.0792      |
| 5       | -0.3989     |
| 6       | 0.1319      |
| 7       | 2.1486      |
| 8       | 0.2470      |

Bias 1,  $BI_r$

| Neurons | Output node |
|---------|-------------|
| 1       | -0.8868     |
| 2       | 2.1283      |
| 3       | 1.4075      |
| 4       | 0.2115      |
| 5       | -0.1466     |
| 6       | 1.9636      |
| 7       | -1.0273     |
| 8       | -2.7433     |

|            |        |
|------------|--------|
| Bias 2, B2 | 1.3462 |
|------------|--------|

### S3.1.3 Case study III: CO<sub>2</sub> absorption by methanol via Rectisol process

Mean square errors:

| Data set   | MSE      |
|------------|----------|
| Training   | 2.85E-05 |
| Validation | 5.50E-05 |
| Testing    | 4.22E-05 |

Weight 1,  $Wl_{r,k}$

| Neurons | Input nodes |         |         |         |         |
|---------|-------------|---------|---------|---------|---------|
|         | 1           | 2       | 3       | 4       | 5       |
| 1       | -1.1612     | 0.4267  | 0.6170  | 0.0776  | -0.0070 |
| 2       | -2.0083     | -0.0265 | -0.0583 | 0.0438  | -0.1383 |
| 3       | 0.0076      | 0.0483  | -0.0250 | 0.0230  | -0.1016 |
| 4       | -0.1773     | 0.2575  | 0.0805  | 0.0104  | -0.0002 |
| 5       | 2.2137      | 0.0507  | 0.0991  | -0.0537 | 0.1723  |
| 6       | 0.1480      | -0.3700 | 0.1323  | -0.0025 | -0.0004 |
| 7       | -0.6150     | 0.1493  | -0.2343 | 0.0470  | 0.0128  |
| 8       | -1.7773     | 0.5226  | 2.2852  | 0.3430  | -0.1023 |

Weight 2,  $W2_r$

| Neurons | Output node |
|---------|-------------|
| 1       | 0.3551      |
| 2       | -0.8543     |
| 3       | -3.6878     |
| 4       | 2.6417      |
| 5       | -0.6012     |
| 6       | 1.1263      |
| 7       | -1.2372     |
| 8       | -0.0256     |

Bias 1,  $Bl_r$

| Neurons | Output node |
|---------|-------------|
| 1       | -1.5419     |
| 2       | 1.4949      |
| 3       | -0.0233     |
| 4       | -0.2838     |
| 5       | -1.4584     |
| 6       | 0.6507      |
| 7       | -1.7367     |
| 8       | -2.5763     |

|            |         |
|------------|---------|
| Bias 2, B2 | -0.9123 |
|------------|---------|

## S3.2 Weights and biases of an artificial neural networks for training the data set of adaptive Latin hypercube sampling.

### S3.2.1 Case study I: ammonia production from syngas

Mean square errors:

| Data set   | MSE      |
|------------|----------|
| Training   | 9.92E-07 |
| Validation | 2.85E-04 |
| Testing    | 6.46E-04 |

Weight 1,  $WI_{r,k}$

| Neurons | Input nodes |         |         |
|---------|-------------|---------|---------|
|         | 1           | 2       | 3       |
| 1       | 0.7357      | -1.3657 | 2.1587  |
| 2       | -2.0546     | -0.9905 | -1.7479 |
| 3       | 2.0853      | 0.3863  | 1.8296  |
| 4       | 1.6385      | 2.1145  | 0.0074  |
| 5       | 1.9052      | -1.9173 | -1.3953 |
| 6       | 1.7018      | -2.2192 | -0.4386 |
| 7       | 1.0337      | 1.9477  | -0.0395 |
| 8       | -2.0165     | 1.2170  | 0.9853  |

Weight 2,  $W2_r$

| Neurons | Output node |
|---------|-------------|
| 1       | -0.0577     |
| 2       | -0.2594     |
| 3       | -0.0703     |
| 4       | 0.3227      |
| 5       | -0.1809     |
| 6       | -0.0355     |
| 7       | 0.4293      |
| 8       | 0.2925      |

Bias 1,  $BI_r$

| Neurons | Output node |
|---------|-------------|
| 1       | -2.9187     |
| 2       | 2.0097      |
| 3       | -1.4948     |
| 4       | -0.6331     |
| 5       | -0.1269     |
| 6       | 1.0142      |
| 7       | 2.1234      |
| 8       | -3.1478     |

|            |        |
|------------|--------|
| Bias 2, B2 | 0.1989 |
|------------|--------|

### S3.2.2 Case study II: methanol production via carbon dioxide hydrogenation

Mean square errors:

| Data set   | MSE      |
|------------|----------|
| Training   | 3.06E-08 |
| Validation | 1.29E-04 |
| Testing    | 1.02E-05 |

Weight 1,  $WI_{r,k}$

| Neurons | Input nodes |         |         |         |
|---------|-------------|---------|---------|---------|
|         | 1           | 2       | 3       | 4       |
| 1       | -0.3066     | -1.5063 | -0.9558 | 0.7309  |
| 2       | 1.0728      | -0.4369 | 0.0888  | -1.6636 |
| 3       | 0.0529      | -0.0215 | 0.0344  | 1.5948  |
| 4       | 0.4170      | -1.7917 | -0.8440 | -1.9836 |
| 5       | 1.4311      | -1.3899 | 1.1017  | 0.9473  |
| 6       | -0.2295     | 0.2196  | 0.0183  | -0.9931 |
| 7       | 2.1562      | -0.3368 | -0.8320 | 1.2068  |
| 8       | -0.9796     | 0.7576  | -0.3045 | -1.2917 |

Weight 2,  $W2_r$

| Neurons | Output node |
|---------|-------------|
| 1       | -0.0626     |
| 2       | -0.0206     |
| 3       | -0.2198     |
| 4       | 0.0139      |
| 5       | -0.0210     |
| 6       | 0.7670      |
| 7       | -0.0847     |
| 8       | 0.6752      |

Bias 1,  $BI_r$

| Neurons | Output node |
|---------|-------------|
| 1       | -2.9615     |
| 2       | -0.4146     |
| 3       | -0.9196     |
| 4       | 0.5101      |
| 5       | 1.2467      |
| 6       | -0.7789     |
| 7       | 3.0020      |
| 8       | -3.3325     |

|            |        |
|------------|--------|
| Bias 2, B2 | 0.6054 |
|------------|--------|

### S3.2.3 Case study III: CO<sub>2</sub> absorption by methanol via Rectisol process

Mean square errors:

| Data set   | MSE      |
|------------|----------|
| Training   | 1.32E-04 |
| Validation | 4.27E-04 |
| Testing    | 2.33E-03 |

Weight 1,  $Wl_{r,k}$

| Neurons | Input nodes |         |         |         |         |
|---------|-------------|---------|---------|---------|---------|
|         | 1           | 2       | 3       | 4       | 5       |
| 1       | -2.0167     | 0.7220  | -0.6211 | -0.7957 | -1.0699 |
| 2       | -0.0506     | 0.3918  | -0.0145 | -1.3910 | 1.2934  |
| 3       | -1.0740     | 0.0579  | 1.1195  | -0.2202 | -0.1242 |
| 4       | 0.4088      | -0.3947 | 0.7916  | 0.9237  | -1.1863 |
| 5       | 1.7848      | -0.5047 | -0.3678 | 1.4842  | 1.2589  |
| 6       | 0.2225      | 0.4808  | 0.9969  | -0.0013 | 0.7223  |
| 7       | 0.3278      | 0.1813  | 0.4486  | 1.1427  | -0.6860 |
| 8       | -1.0223     | 0.9647  | 1.4222  | 0.1476  | 0.2411  |

Weight 2,  $W2_r$

| Neurons | Output node |
|---------|-------------|
| 1       | -0.3738     |
| 2       | 0.2561      |
| 3       | 0.4370      |
| 4       | -0.2361     |
| 5       | 0.1715      |
| 6       | 0.2842      |
| 7       | 0.0372      |
| 8       | 0.3227      |

Bias 1,  $Bl_r$

| Neurons | Output node |
|---------|-------------|
| 1       | 2.9622      |
| 2       | -2.1864     |
| 3       | 0.0097      |
| 4       | -0.7930     |
| 5       | 0.4856      |
| 6       | 0.7373      |
| 7       | 2.5068      |
| 8       | -1.8019     |

|            |        |
|------------|--------|
| Bias 2, B2 | 0.5801 |
|------------|--------|
